# Supplementary material for: Growth and Behavior of North American Microbes on Phragmites australis Leaves
Source: MDPI journal article supplement (doi:10.3390/microorganisms8050690), 2020-05-08
Supplement: s1 [file s1]

### Appendix S3: Literature Used in Literature Based Microbiome Comparison

- Abed, R. M. M., Al-Kharusi, S., Gkorezis, P., Prigent, S., & Headley, T. (2018). Bacterial communities in the rhizosphere of *Phragmites australis* from an oil-polluted wetland. *Archives of Agronomy and Soil Science*, 64(3), 360–370. <https://doi.org/10.1080/03650340.2017.1352087>
- Achon, M. A., Serrano, L., Clemente-Orta, G., & Sossai, S. (2017). First Report of Maize chlorotic mottle virus on a Perennial Host, *Sorghum halepense*, and Maize in Spain. *Plant Disease*, 101(2), 393–393.
- Al-Ani, R. A., Adhab, M. A., El-Muadhidi, M. A., & Al-Fahad, M. A. (2012). Biological and Serological Identification of Barley Yellow Dwarf Virus (BYDV) and Its Distribution in Iraq. *Journal of Agricultural Science*, 4(2). <https://doi.org/10.5539/jas.v4n2p39>
- Al-Garni, S. (2006). Increasing NaCl - Salt Tolerance of a Halophytic Plant *Phragmites australis* by Mycorrhizal Symbiosis. *American-Eurasian Journal of Agricultural & Environmental Sciences*, 1(2), 119–126.
- Allen, W. J., DeVries, A. E., Bologna, N. A., Bickford, W. A., Kowalski, K. P., Meyerson, L. A., & Cronin, J. T. (2020). Intraspecific and biogeographic variation in foliar fungal communities and pathogen damage of native and invasive *Phragmites australis*. *Global Ecology and Biogeography*, doi: 10.1111/geb.13097
- Angelini, P., Rubini, A., Gigante, D., Reale, L., Pagiotti, R., & Venanzoni, R. (2012). The endophytic fungal communities associated with the leaves and roots of the common reed (*Phragmites australis*) in Lake Trasimeno (Perugia, Italy) in declining and healthy stands. *Fungal Ecology*, 5(6), 683–693. <https://doi.org/10.1016/j.funeco.2012.03.001>
- Apinis, A. E., Chesters, C. G. C., & Taligoola, H. K. (1972a). Colonisation of *Phragmites communis* leaves by fungi. *Nova Hedwigia*, 23, 113–124.
- Apinis, A. E., Chesters, C. G. C., & Taligoola, H. K. (1972b). Microfungi Colonizing Submerged Standing Culms of *Phragmites communis* Trin. *Nova Hedwigia*, 23, 473–480.
- Apinis, A. E., Chesters, C. G. C., & Taligoola, H. K. (1975). Microfungi colonizing nodes and internodes of aerial standing culms of *Phragmites communis* Trin. *Nova Hedwigia*, 26, 495–507.
- Arthur, J. C. (1902). The Uredineæ occurring upon *Phragmites*, *Spartina*, and *Arundinaria* in America. *Botanical Gazette*, 34(1), 1–20.
- Arthur, J. C. (1912). Cultures of Uredineae in 1911. *Mycologia*, 4(2), 49–65. <https://www.jstor.org/stable/3753541>
- Baka, Z. A., & Gjerum, H. B. (1996). Egyptian Uredinales. I. Rusts on wild plants from the Nile Delta. *Mycotaxon*, 60, 291–303.
- Bán, R., Fischl, G., & Virányi, F. (1996). A spatio-temporal analysis of fungal pathogens on reed in natural habitats. *Acta Phytopathologica et Entomologica Hungarica*, 31(3–4), 219–227.
- Bán, R., Virányi, F., & Obádovics, C. (1998). Különböző típusú nádállományok gomba okozta

- beegség. *Növénytermelés*, 47(4), 407–420.
- Bickford, W. A., Goldberg, D. E., Kowalski, K. P., & Zak, D. R. (2018). Root endophytes and invasiveness: no difference between native and non-native *Phragmites* in the Great Lakes Region. *Ecosphere*, 9(12). <https://doi.org/10.1002/ecs2.2526>
- Björk, A. S. (1962). Kromosomgeografi och kromosomekologi beträffande *Phragmites communis* (Chromosome geography and ecology of *Phragmites communis*). *Skrifter Utgivna Av Södra Sveriges Fiskeriförening*, 71–81.
- Borsodi, A. K., Ruzsnyák, A., Molnár, P., Vladár, P., Reskóné, M. N., Tóth, E. M., Sipos, R., Gedeon, G., & Márialigeti, K. (2007). Metabolic activity and phylogenetic diversity of reed (*Phragmites australis*) periphyton bacterial communities in a Hungarian shallow soda lake. *Microbial Ecology*, 53(4), 612–620. <https://doi.org/10.1007/s00248-006-9133-x>
- Cerri, M., Reale, L., Moretti, C., Buonauro, R., Coppi, A., Ferri, V., Foggi, B., Gigante, D., Lastrucci, L., Quaglia, M., Venanzoni, R., & Ferranti, F. (2018). Claviceps arundinis identification and its role in the die-back syndrome of *Phragmites australis* populations in central Italy. *Plant Biosystems*, 152(4), 818–824. <https://doi.org/10.1080/11263504.2017.1347111>
- Chaturvedi, S., Chandra, R., & Rai, V. (2006). Isolation and characterization of *Phragmites australis* (L.) rhizosphere bacteria from contaminated site for bioremediation of colored distillery effluent. *Ecological Engineering*, 27(3), 202–207. <https://doi.org/10.1016/j.ecoleng.2006.02.008>
- Çikikçi, G. (2009). Yüksek Lisans tezi Tekirdağ ılı'nde tahıl üretim alanlarındaki yabancı otlarda görülen virüslerin saptanması üzerine araştırmalar (Identification of viruses on weeds around the cereal fields in Tekirdağ province). *Masters Thesis*, 1–31. ???
- Clay, K., Shearin, Z. R. C., Bourke, K. A., Bickford, W. A., & Kowalski, K. P. (2016). Diversity of fungal endophytes in non-native *Phragmites australis* in the Great Lakes. *Biological Invasions*, 18(9). <https://doi.org/10.1007/s10530-016-1137-y>
- Constantinescu, O. (1983). Deightonella on *Phragmites*. *Proceedings of the Koninklijke Nederlandse Akademie van Wetenschappen. Series C, Biological and Medical Sciences.*, 86, 137–141.
- Corner, E. J. H. (1935). The fungi of Wicken Fen, Cambridgeshire. *Transactions of the British Mycological Society*, 19(4), 280–287.
- Crocker, E. V., Karp, M. A., & Nelson, E. B. (2015). Virulence of oomycete pathogens from *Phragmites australis*-invaded and noninvaded soils to seedlings of wetland plant species. *Ecology and Evolution*, 5(11), 2127–2139. <https://doi.org/10.1002/ece3.1468>
- Crous, P. W., & Groenewald, J. Z. (2013). A phylogenetic re-evaluation of Arthrinium. *IMA Fungus*, 4(1), 133–154. <https://doi.org/10.5598/ima fungus.2013.04.01.13>
- Cunnell, G. J. (1958). On *Robillarda phragmitis* sp. nov. *Transactions of the British Mycological Society*, 4158(4), 405–412.
- Durska, B. (1969). Rozmieszczeni w Polce kilku gatunków grzybów pasożytniczych trzciny.

- (Distribution of some parasitic fungi on *Phragmites communis* Trin. In Poland). *Acta Mycologica*, 5, 117–133.
- Durska, B. (1970). Changes in the reed (*Phragmites communis* Trin.) condition caused by disease of fungal and animal origin. *Polskie Archiwum Hydrobiologii*, 17(30), 373–396.
- Ellis, M. B., Ellis, E. A., & Ellis, J. P. (1951). British marsh and fen fungi. *Transactions of the British Mycological Society*, 34, 147–169.
- Fischer, M. S., & Rodriguez, R. J. (2013). Fungal endophytes of invasive *Phragmites australis* populations vary in species composition and fungicide susceptibility. *Symbiosis*, 61(2), 55–62. <https://doi.org/10.1007/s13199-013-0261-z>
- Fischl, G. (1995). A balaton mocsári növényein előforduló mikroszkopikus gombafajok (Microscopic fungi occurring on aquatic plants of Balaton Lake). *Növényvédelem*, 31, 229–331.
- Fischl, G., Büergés, G., & Szeglet, P. (1998). Plant hygiene conditions of the reed in lake Balaton with special view of fungal diseases. *Proceedings of the 50th International Symposium on Crop Protection*, 53(9), 1689–1699. <https://doi.org/10.1017/CBO9781107415324.004>
- Fraser, W. P. (1919). Cultures of Heteroecious Rusts in 1918. *Mycologia*, 11(3), 129. <https://doi.org/10.2307/3753418>
- Fukuhara, M. (2002). Three *Phaeosphaeria* species and *Paraphaeosphaeria michotii* isolated from *Phragmites* leaves in Osaka, Japan. *Mycoscience*, 43(5), 375–382. <https://doi.org/10.1007/s102670200055>
- Guy, P. L., Johnstone, G. R., & Morris, D. I. (1987). Barley yellow dwarf viruses in, and aphids on, grasses (including cereals) in Tasmania. *Australian Journal of Agricultural Research*, 38(1), 139–152. <https://doi.org/10.1071/AR9870139>
- Harada, Y. (1987). Aecial hosts for three graminicolous *Puccinia* species (Uredinales) in Japan, with a designation of biologic forms in *Puccinia phragmitis*. *Transactions of the Mycological Society of Japan*, 28(2), 197–208.
- Harada, Y., & Hasegawa, H. (1975). Aecial states of two *Phragmites* rust fungi, *Puccinia moriokaensis* S. Ito and *P. okatamaensis* S. Ito. *Transactions of the Mycological Society of Japan*, 16, 42–50. <https://doi.org/10.1017/CBO9781107415324.004>
- Hipol, R. M., & Cuevas, V. C. (2014). Copper Tolerance and Copper Accumulation of Culturable Endophytic Yeasts of *Phragmites Australis* Cav . ( Trin ) ex Steud . From the Mine Tailings Pond in Mankayan , Benguet , Philippines. *Asian Journal of Applied Sciences*, 02(05), 636–643.
- Hodson, E. R. (1900). A New Species of *Neovossia*. *Botanical Gazette*, 30(4), 273–274.
- Ilbağı, H. (2006). Common reed (*Phragmites communis*) is a natural host of important cereal viruses in the Trakya region of Turkey. *Phytoparasitica*, 34(5), 441–448. <https://doi.org/10.1007/BF02981198>

- Ingold, C. T. (1954). Aquatic Ascomycetes: Discomycetes from lakes. *Transactions of the British Mycological Society*, 37, 1–18.
- Ingold, C. T. (1955). Aquatic Ascomycetes: further species from the English Lake District. *Transactions of the British Mycological Society*, 38, 157–168.
- Itō, S. (1909). On the Uredineae Parasitic on the Japanese Gramineae. *Journal of the College of Agriculture*, 3, 180–262.
- Ivanović, D., Osler, R., Katis, N., Ivanović, M., Lgnjatović, D., Ivanović, D., Osler, R., Katis, N., Ivanović, M., & Principal, D. L. (1995). *Principal maize viruses in Mediterranean countries*. To cite this version : HAL Id : hal-00885702 maize viruses in Mediterranean countries. 15, 443–446.
- Ivanović, Dragica. (1992). Distribution and frequency of maize dwarf mosaic virus in Yugoslavia. *Zaštita Bilja*, 43(1), br.199: 35-46.  
<https://doi.org/10.1017/CBO9781107415324.004>
- Jiang, N., Li, J., & Tian, C. M. (2018). *Arthrinium* species associated with bamboo and reed plants in China. *Fungal Systematics and Evolution*, 2(December), 1–9.  
<https://doi.org/10.3114/fuse.2018.02.01>
- Jordá, C., Font, I., Lázaro, A., Juárez, M., Ortega, A., & Lacasa, A. (2000). New Natural Hosts of Tomato spotted wilt virus . *Plant Disease*, 84(4), 489–489.  
<https://doi.org/10.1094/pdis.2000.84.4.489d>
- Jorda, C., Osca, J. M., & Alfaro, A. (1987). Comparative study of the Spanish strains of BYDV. *Proc. 7 Th Congress of the Mediterranean Phytopathological Union (Granada, Spain)*, 106–107. <https://www.unhcr.org/publications/manuals/4d9352319/unhcr-protection-training-manual-european-border-entry-officials-2-legal.html?query=excom> 1989
- Kanaujia, R. S., Kishore, R., & Singh, C. S. (1978). Three new fungal diseases from India. *Acta Botanica Indica*, 6, 92–93.
- Kurokawa, K., & Tojo, M. (2010). First record of *Pythium grandisporangium* in Japan. *Mycoscience*, 51(4), 321–324. <https://doi.org/10.1007/s10267-010-0041-z>
- Li, Y. H., Zhu, J. N., Liu, Q. F., Liu, Y., Liu, M., Liu, L., & Zhang, Q. (2013). Comparison of the diversity of root-associated bacteria in *Phragmites australis* and *Typha angustifolia* L. in artificial wetlands. *World Journal of Microbiology and Biotechnology*, 29(8), 1499–1508.  
<https://doi.org/10.1007/s11274-013-1316-2>
- Li, Y. H., Zhu, J. N., Zhai, Z. H., & Zhang, Q. (2010). Endophytic bacterial diversity in roots of *Phragmites australis* in constructed Beijing Cuihu Wetland (China). *FEMS Microbiology Letters*, 309(1), 84–93. <https://doi.org/10.1111/j.1574-6968.2010.02015.x>
- Llirós, M., Trias, R., Borrego, C., & Bañeras, L. (2014). Specific Archaeal Communities are Selected on the Root Surfaces of *Ruppia* spp. and *Phragmites australis*. *Wetlands*, 34(2), 403–411. <https://doi.org/10.1007/s13157-013-0507-9>
- Mathew, D. C., Ho, Y. N., Gicana, R. G., Mathew, G. M., Chien, M. C., & Huang, C. C. (2015). A rhizosphere-associated symbiont, *Photobacterium* spp. strain MELD1, and its targeted

- synergistic activity for phytoprotection against mercury. *PLoS ONE*, 10(3), 1–18.  
<https://doi.org/10.1371/journal.pone.0121178>
- Matos, M. P. (2016). Molecular identification of rhizosphere bacteria from *Phragmites* sp. growing in constructed wetlands treating benzene derivative compounds *October 2016. October*.
- Mazurkiewicz-Zapałowicz, K. (2010). Microscopic fungi of *Phragmites australis* in the littoral of two lakes in drawa national park (Nw Poland). *Polish Botanical Journal*, 55(2), 381–389.
- Micsinai, A., Borsodi, A. K., Csengeri, V., Horváth, A., Oravecz, O., Nikolausz, M., Reskóné, M. N., & Márialigeti, K. (2003). Rhizome-associated bacterial communities of healthy and declining reed stands in Lake Velencei, Hungary. *Hydrobiologia*, 506–509(2001), 707–713.  
<https://doi.org/10.1023/B:HYDR.0000008590.37567.fa>
- Nechwatal, J., & Mendgen, K. (2009). Evidence for the occurrence of natural hybridization in reed-associated *Pythium* species. *Plant Pathology*, 58(2), 261–270.  
<https://doi.org/10.1111/j.1365-3059.2008.01955.x>
- Nechwatal, Jan, & Lebecka, R. (2014). Genetic and phenotypic analyses of *Pythium* isolates from reed suggest the occurrence of a new species, *P. phragmiticola*, and its involvement in the generation of a natural hybrid. *Mycoscience*, 55(2), 134–143.  
<https://doi.org/10.1016/j.myc.2013.07.001>
- Nechwatal, Jan, Wielgoss, A., & Mendgen, K. (2005). *Pythium phragmitis* sp. nov., a new species close to *P. arrhenomanes* as a pathogen of common reed (*Phragmites australis*). *Mycological Research*, 109(12), 1337–1346. <https://doi.org/10.1017/S0953756205003990>
- Nechwatal, Jan, Wielgoss, A., & Mendgen, K. (2008). Diversity, host, and habitat specificity of oomycete communities in declining reed stands (*Phragmites australis*) of a large freshwater lake. *Mycological Research*, 112(6), 689–696. <https://doi.org/10.1016/j.mycres.2007.11.015>
- Nelson, E. B., & Karp, M. A. (2013). Soil pathogen communities associated with native and non-native *Phragmites australis* populations in freshwater wetlands. *Ecology and Evolution*, 3(16), 5254–5267. <https://doi.org/10.1002/ece3.900>
- Neubert, K., Mendgen, K., Brinkmann, H., & Wirsal, S. G. R. (2006). Only a few fungal species dominate highly diverse mycofloras associated with the common reed. *Applied and Environmental Microbiology*, 72(2), 1118–1128. <https://doi.org/10.1128/AEM.72.2.1118-1128.2006>
- Ondrej, M. (1984). Vyskyt imperfektních hub rodu *Deightonella* Hughes v Československu. *Česká Mykologie*, 38, 39–45.
- Pelaez, F., Collado, J., Arenal, F., Basilio, A., Cabello, A., Diez Matas, M. T., Garcia, J. B., Gonzalez Del Val, A., Gonzalez, V., Gorrochategui, J., Hernández, P., Martin, I., Platas, G., & Vicente, F. (1998). Endophytic fungi from plants living on gypsum soils as a source of secondary metabolites with antimicrobial activity. *Mycological Research*, 102(6), 755–761.  
<https://doi.org/10.1017/S0953756297005662>
- Poon, M. O. K., & Hyde, K. D. (1998a). Biodiversity of intertidal estuarine fungi on *Phragmites* at Mai Po Marshes, Hong Kong. *Botanica Marina*, 41(2), 141–155.

<https://doi.org/10.1515/botm.1998.41.1-6.141>

- Poon, M. O. K., & Hyde, K. D. (1998b). Evidence for the Vertical Distribution of Saprophytic fungi on senescent *Phragmites australis* Culms at Mai Po Marshes, Hong Kong. *Botanica Marina*, 41, 281–292.
- Sánchez, A. (1967). The sections *Apostemum* and *Microstemum* of the genus *Vibrissea* (Fungi). *Journal of the Agricultural University of Puerto Rico*, 51, 79–93.  
<https://doi.org/10.1017/CBO9781107415324.004>
- Sauvêtre, A., & Schröder, P. (2015). Uptake of carbamazepine by rhizomes and endophytic bacteria of *Phragmites australis*. *Frontiers in Plant Science*, 6(FEB), 1–11.  
<https://doi.org/10.3389/fpls.2015.00083>
- Shearer, J. F., & Harms, N. E. (2012). *Survey for Pathogens of Phragmites in New York*. April, 1–10.
- Shearin, Z. R. C., Filipek, M., Desai, R., Bickford, W. A., Kowalski, K. P., & Clay, K. (2018). Fungal endophytes from seeds of invasive, non-native *Phragmites australis* and their potential role in germination and seedling growth. *Plant and Soil*, 422(1–2).  
<https://doi.org/10.1007/s11104-017-3241-x>
- Soares, M. A., Li, H. Y., Kowalski, K. P., Bergen, M., Torres, M. S., & White, J. F. (2016). Functional Role of Bacteria from Invasive *Phragmites australis* in Promotion of Host Growth. *Microbial Ecology*, 72(2), 407–417. <https://doi.org/10.1007/s00248-016-0793-x>
- Soares, Marcos Antônio, Li, H. Y., Kowalski, K. P., Bergen, M., Torres, M. S., & White, J. F. (2016). Evaluation of the functional roles of fungal endophytes of *Phragmites australis* from high saline and low saline habitats. *Biological Invasions*, 18(9), 2689–2702.  
<https://doi.org/10.1007/s10530-016-1160-z>
- Sutton, B. C., & Alcornb, J. L. (1974). Neottiosporina. *Australian Journal of Botany*, 22, 517–530.
- Taligoola, H. K., Apinis, A. E., & Chesters, C. G. C. (1972). Microfungi colonising collapsed aerial parts of *Phragmites communis* Trin. in water. *Nova Hedwigia*, 23, 465–472.
- Terui, M., & Harada, Y. (1974). An ovaricolous smut of reeds from Japan, *Neovossia danubialis* Savulescu. *Transactions of the Mycological Society of Japan*, 15(3), 215–217.
- Tokuyama, T., Mine, A., Kamiyama, K., Yabe, R., Satoh, K., Matsumoto, H., Takahashi, R., & Itonaga, K. (2004). *Nitrosomonas communis* strain YNSRA, an ammonia-oxidizing bacterium, isolated from the reed rhizoplane in an aquaponics plant. *Journal of Bioscience and Bioengineering*, 98(4), 309–312. [https://doi.org/10.1016/s1389-1723\(04\)00288-9](https://doi.org/10.1016/s1389-1723(04)00288-9)
- Van Ryckegem, G., Gessner, M. O., & Verbeken, A. (2007). Fungi on leaf blades of *Phragmites australis* in a brackish tidal marsh: Diversity, succession, and leaf decomposition. *Microbial Ecology*, 53(4), 600–611. <https://doi.org/10.1007/s00248-006-9132-y>
- Van Ryckegem, Gunther, & Verbeken, A. (2005a). Fungal diversity and community structure on *Phragmites australis* (Poaceae) along a salinity gradient in the Scheldt estuary (Belgium). *Nova Hedwigia*, 80(1–2), 173–197. <https://doi.org/10.1127/0029-5035/2005/0080-0173>

- Van Ryckegem, Gunther, & Verbeken, A. (2005b). Fungal ecology and succession on *Phragmites australis* in a brackish tidal marsh. II. Stems. *Fungal Diversity*, 20, 209–233.
- Ważny, J., & Wytwer, T. (1963). Badania nad odpornością trzciny (*Phragmites communis* Trin.) na działanie grzybów niszczących drewno. *Folia Forestalia Polonica, Seria B*, 5, 171–194.
- White, J. F., Kingsley, K. I., Kowalski, K. P., Irizarry, I., Micci, A., Soares, M. A., & Bergen, M. S. (2018). Disease protection and allelopathic interactions of seed-transmitted endophytic pseudomonads of invasive reed grass (*Phragmites australis*). *Plant and Soil*, 422, 195–208. <https://doi.org/10.1007/s11104-016-3169-6>
- Wielgoss, A., Nechwatal, J., Bogs, C., & Mendgen, K. (2009). Host plant development, water level and water parameters shape *Phragmites australis*-associated oomycete communities and determine reed pathogen dynamics in a large lake. *FEMS Microbiology Ecology*, 69(2), 255–265. <https://doi.org/10.1111/j.1574-6941.2009.00701.x>
- Wirsal, S. G.R., Leibinger, W., Ernst, M., & Mendgen, K. (2001). Genetic diversity of fungi closely associated with common reed. *New Phytologist*, 149(3), 589–598. <https://doi.org/10.1046/j.1469-8137.2001.00038.x>
- Wirsal, Stefan G.R. (2004). Homogenous stands of a wetland grass harbour diverse consortia of arbuscular mycorrhizal fungi. *FEMS Microbiology Ecology*, 48(2), 129–138. <https://doi.org/10.1016/j.femsec.2004.01.006>
- Wirsal, Stefan G.R., Runge-Froböse, C., Ahrén, D. G., Kemen, E., Oliver, R. P., & Mendgen, K. W. (2002). Four or more species of *Cladosporium* sympatrically colonize *Phragmites australis*. *Fungal Genetics and Biology*, 35(2), 99–113. <https://doi.org/10.1006/fgbi.2001.1314>
- Wong, M. K. M., & Hyde, K. D. (2001). Diversity of fungi on six species of Gramineae and one species of Cyperaceae in Hong Kong. *Mycological Research*, 105(12), 1485–1491. <https://doi.org/10.1017/S0953756201004695>
- Wu, T., Xu, J., Xie, W., Yao, Z., Yang, H., Sun, C., & Li, X. (2018). *Pseudomonas aeruginosa* L10: A hydrocarbon-degrading, biosurfactant-producing, and plant-growth-promoting endophytic bacterium isolated from a Reed (*Phragmites australis*). *Frontiers in Microbiology*, 9(MAY), 1–12. <https://doi.org/10.3389/fmicb.2018.01087>
