# Supplementary material for: Growth and Behavior of North American Microbes on Phragmites australis Leaves
Source: MDPI journal article supplement (doi:10.3390/microorganisms8050690), 2020-05-08
Supplement: s1 [file s1]

## Appendix S1: Supplemental Methods

**Table S1:** PCR Conditions and Primer Sequences

| Gene Region        | Primer | Primer Sequence                                          | PCR Mastermix                                                                                                                                              | PCR Conditions                                                                                                                                                              |
|--------------------|--------|----------------------------------------------------------|------------------------------------------------------------------------------------------------------------------------------------------------------------|-----------------------------------------------------------------------------------------------------------------------------------------------------------------------------|
| SSU                | NS1    | 5'- GTAGTCATATGCTTGTCTC -3'                              | 10.0 uL 5x Buffer*<br>4.0 uL 25uM MgCl<br>1.0 uL 10uM dNTPs<br>1.0 uL 10uM NS1<br>1.0 uL 10uM NS4<br>0.25 uL Taq*<br>1 uL Template DNA<br>31.75 uL H2O     | Initial denaturation: 94°C for 2 min<br>40 cycles<br>denaturation: 94°C for 30 s<br>annealing: 47°C for 60 s<br>extension: 72°C for 80 s<br>final extension: 72°C for 2 min |
|                    | NS4    | 5'- CTTCCGTCAATTCCTTTAA -3'                              |                                                                                                                                                            |                                                                                                                                                                             |
| ITS                | ITS1F  | 5'- CTTGGTCATTTAGAGGAAGTAA -3'                           | 10.0 uL 5x Buffer*<br>4.0 uL 25uM MgCl<br>1.0 uL 10uM dNTPs<br>1.0 uL 10uM ITS1-F<br>1.0 uL 10uM ITS4<br>0.25 uL Taq*<br>1 uL Template DNA<br>31.75 uL H2O | Initial denaturation: 94°C for 2 min<br>40 cycles<br>denaturation: 94°C for 30 s<br>annealing: 51°C for 30 s<br>extension: 72°C for 45 s<br>final extension: 72°C for 2 min |
|                    | ITS4   | 5'- TCCTCCGCTTATTGATATGC -3'                             |                                                                                                                                                            |                                                                                                                                                                             |
| LSU                | LR16   | 5'- TTCCACCCAAACACTCG -3'                                | 10.0 uL 5x Buffer*<br>4.0 uL 25uM MgCl<br>1.0 uL 10uM dNTPs<br>1.0 uL 10uM LR16<br>1.0 uL 10uM LROR<br>0.25 uL Taq*<br>1 uL Template DNA<br>31.75 uL H2O   | Initial denaturation: 94°C for 2 min<br>40 cycles<br>denaturation: 94°C for 30 s<br>annealing: 52°C for 30 s<br>extension: 72°C for 45 s<br>final extension: 72°C for 2 min |
|                    | LROR   | 5'- ACCCGCTGAACTTAAGC -3'                                |                                                                                                                                                            |                                                                                                                                                                             |
| 16S                | 799F2  | 5'- AACMGGATTAGATACCCGG -3'                              | 10.0 uL 5x Buffer*<br>4.0 uL 25uM MgCl<br>1.0 uL 10uM dNTPs<br>1.0 uL 10uM 799F2<br>1.0 uL 10uM 1498r<br>0.25 uL Taq*<br>1 uL Template DNA<br>31.75 uL H2O | Initial denaturation: 94°C for 2 min<br>40 cycles<br>denaturation: 94°C for 30 s<br>annealing: 49°C for 30 s<br>extension: 72°C for 5 min<br>final extension: 10 min        |
|                    | 1498r  | 5'- GGTTACCTTGTTACGACTT -3'                              |                                                                                                                                                            |                                                                                                                                                                             |
| CPN60 <sup>1</sup> | H279   | 5'- CGCCAGGGTTTTCCCAGTCACGACGAIIGCIGGIGAYGGIACIACIAC -3' | 10.0 uL 5x Buffer*<br>4.0 uL 25uM MgCl<br>1.0 uL 10uM dNTPs<br>1.0 uL 10uM H279<br>1.0 uL 10uM H280<br>0.25 uL Taq*<br>1 uL Template DNA<br>31.75 uL H2O   | Initial denaturation: 94°C for 2 min, 40 cycles<br>denaturation: 94°C for 60 s<br>annealing: 52°C for 2 min<br>extension: 72°C for 5 min<br>final extension: 10 min         |
|                    | H280   | 5'- AGCGGATAACAATTTACACAGGAYKIYKITCICCRAAICCGGIGCYTT -3' |                                                                                                                                                            |                                                                                                                                                                             |

\* GoTaq DNA Polymerase Kit (Promega)

<sup>1</sup> For sequencing, use M13F-47 = CGCCAGGGTTTTCCCAGTCACGAC and M13R-48 = AGCGGATAACAATTTACACAGGA

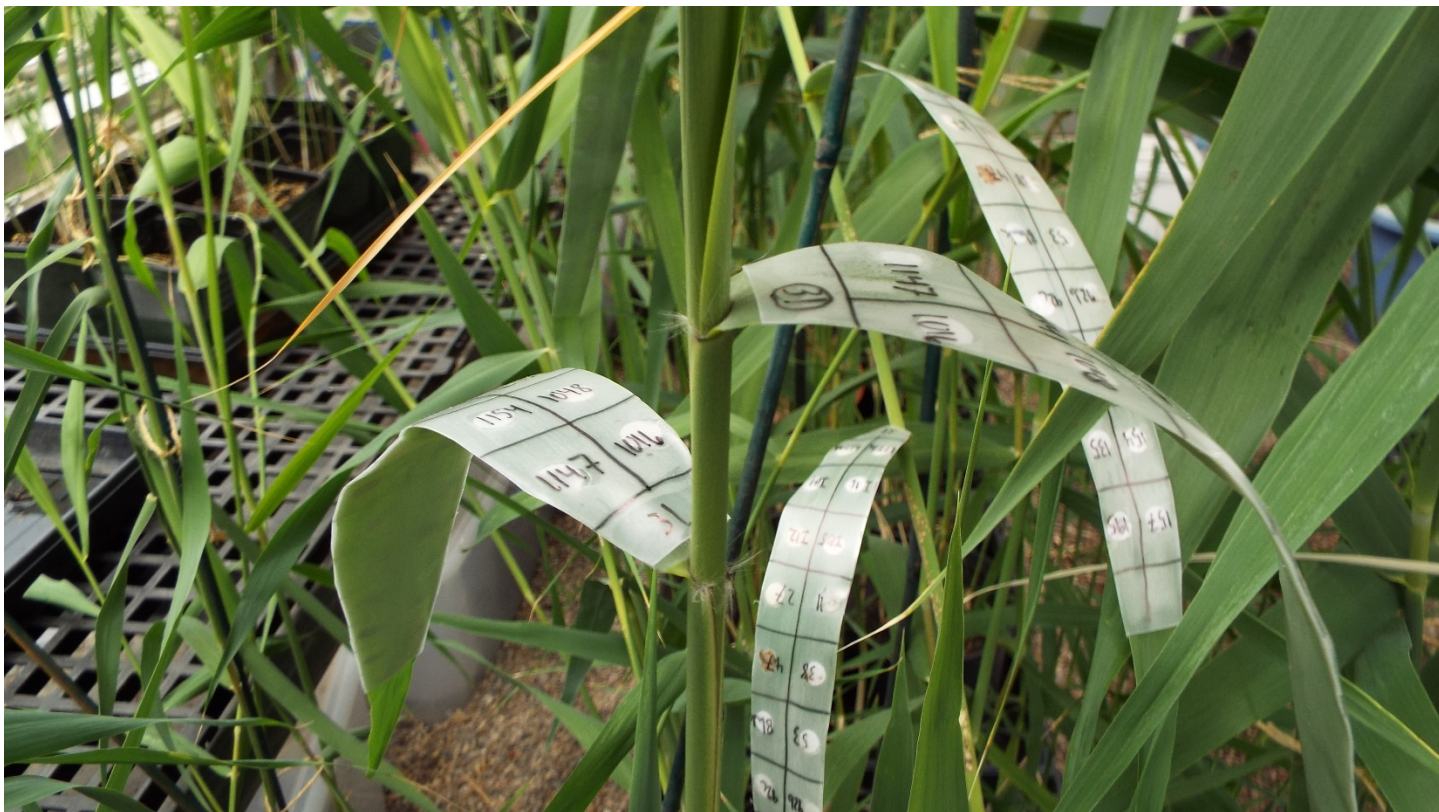

**Figure S1:** Mature leaf inoculation method. When saturated with live cells up to 20 disks at a time were placed inside a folded sheet of Parafilm® separated in a 2 cm grid and moistened with 5  $\mu$ L of sterile molecular grade H<sub>2</sub>O. Fully loaded parafilm sheets were wrapped around the mature leaves in the upper 1/3 of 6–8-month-old plants to form a flat sleeve, with the disks on the adaxial surface, and sealed to within 1 mm of the edge of the leaf.
