# Supplementary material for: Growth and Behavior of North American Microbes on Phragmites australis Leaves
Source: MDPI journal article supplement (doi:10.3390/microorganisms8050690), 2020-05-08
Supplement: s1 [file s1]

**Appendix S2:** List of microbes included in assays of mature leaves and seedlings. See full data release for raw data (<https://doi.org/10.5066/P9QYEMGJ>)

| OTU     | Kingdom | Taxon name                      | UNITE species hypothesis    | State collected from | subsp. isolated from               | Leaf types isolated from | Genbank Accession Numbers |
|---------|---------|---------------------------------|-----------------------------|----------------------|------------------------------------|--------------------------|---------------------------|
| LSU0011 | Fungi   | Penicillium citrinum            | SH1529986.08FU              | North Carolina       | americanus                         | Healthy                  | MT000374,478              |
| LSU0027 | Fungi   | Sarocladium kiliense            | SH1706027.08FU              | North Carolina       | americanus                         | Diseased                 | MT000375,479              |
| LSU0038 | Fungi   | Pleosporales sp.                | SH1525096.08FU              | North Carolina       | americanus                         | Diseased                 | MT000321,376,480          |
| LSU0047 | Fungi   | Chaetomium globosum             | SH1615599.08FU              | North Carolina       | americanus, australis              | Both                     | MT000377                  |
| LSU0053 | Fungi   | Paraphaeosphaeria michotii      | SH1888878.08FU              | North Carolina       | americanus                         | Diseased                 | MT000378,481              |
| LSU0062 | Fungi   | Diaporthe sp.                   | SH1540603.08FU              | North Carolina       | americanus                         | Diseased                 | MT000322,379              |
| LSU0064 | Fungi   | Stagonospora sp.                | SH1576715.08FU              | North Carolina       | americanus, australis, Gulf, Delta | Both                     | MT000380,482              |
| LSU0083 | Fungi   | Phaeosphaeriaceae sp.           | SH1525099.08FU              | North Carolina       | australis                          | Diseased                 | MT000381,483              |
| LSU0093 | Fungi   | Arthrinium sacchari             | SH1907630.08FU              | Virginia             | australis                          | Healthy                  | MT000329,394,490          |
| LSU0107 | Fungi   | Stagonospora neglecta           | SH1525143.08FU              | Virginia             | australis                          | Diseased                 | MT000395                  |
| LSU0119 | Fungi   | Cladosporium sp.                | SH1572792.08FU              | Virginia             | americanus                         | Diseased                 | MT000323,382,484          |
| LSU0128 | Fungi   | Clathrococcum neglectum         | SH1547057.08FU              | Virginia             | americanus, australis              | Diseased                 | MT000383                  |
| LSU0135 | Fungi   | Phomatospora sp.                | SH1193352.08FU              | Maryland             | americanus, australis, Delta       | Both                     | MT000324,384,485          |
| LSU0151 | Fungi   | Pseudoanthostomella sepelibilis | SH1551327.08FU              | Maryland             | australis                          | Healthy                  | MT000385                  |
| LSU0154 | Fungi   | Stagonospora neglecta           | SH1525143.08FU              | Maryland             | australis                          | Diseased                 | MT000386                  |
| LSU0157 | Fungi   | Periconia homothallica          | SH1573195.08FU              | Maryland             | australis                          | Diseased                 | MT000325,387,486          |
| LSU0172 | Fungi   | Stagonospora neglecta           | SH1525143.08FU              | Maryland             | australis                          | Diseased                 | MT000388                  |
| LSU0182 | Fungi   | Sordariomycetes sp.             | Unresolved at 97% threshold | New Jersey           | australis, Gulf                    | Healthy                  | MT000330                  |
| LSU0195 | Fungi   | Trametes versicolor             | SH1565939.08FU              | New Jersey           | australis                          | Diseased                 | MT000331,396,491          |
| LSU0196 | Fungi   | Arthrinium sp.                  | SH1540046.08FU              | New Jersey           | americanus, australis, Gulf        | Both                     | MT000332,397,492          |

|         |          |                           |                |            |                                    |          |                  |
|---------|----------|---------------------------|----------------|------------|------------------------------------|----------|------------------|
| LSU0199 | Fungi    | Apiosporaceae sp.         | SH1540045.08FU | New Jersey | americanus, australis, Gulf        | Both     | N/A              |
| LSU0203 | Fungi    | Cainia graminis           | SH1143210.08FU | New Jersey | australis                          | Diseased | MT000333,398,493 |
| LSU0207 | Fungi    | Colletotrichum fioriniae  | SH1543706.08FU | New Jersey | australis                          | Diseased | MT000399,494     |
| LSU0213 | Bacteria | Bacillus megaterium       | N/A            | New Jersey | australis                          | Diseased | N/A              |
| LSU0217 | Fungi    | Utrechtiana roumegueri    | SH1187174.08FU | New Jersey | americanus, australis              | Both     | MT000400,495     |
| LSU0240 | Fungi    | Gibberella fujikuroi      | SH1610159.08FU | New Jersey | americanus                         | Diseased | MT000496         |
| LSU0245 | Fungi    | Microdochium sp.          | SH1555458.08FU | New Jersey | americanus                         | Diseased | MT000334,402,497 |
| LSU0246 | Fungi    | Microdochium sp.          | SH1555458.08FU | New Jersey | americanus                         | Diseased | MT000403,498     |
| LSU0254 | Fungi    | Cladosporium halotolerans | SH1572792.08FU | Delaware   | americanus, australis, Gulf, Delta | Both     | MT000326,389,487 |
| LSU0261 | Fungi    | Paraphaeosphaeria sp.     | SH1525447.08FU | Delaware   | americanus, australis              | Diseased | MT000327,390     |
| LSU0270 | Fungi    | Trametopsis cervina       | SH1543622.08FU | Delaware   | australis                          | Diseased | MT000391         |
| LSU0279 | Bacteria | Bacillus megaterium       | N/A            | Florida    | Gulf variety                       | Both     | MN992014         |
| LSU0281 | Fungi    | Purpureocillium lilacinum | SH1946757.08FU | Florida    | Gulf variety, Delta                | Both     | MT000405,499     |
| LSU0305 | Fungi    | Ascochyta manawaorae      | SH1235307.08FU | Florida    | Gulf variety                       | Diseased | MT000406         |
| LSU0311 | Fungi    | Stagonospora sp.          | SH1235289.08FU | Florida    | Gulf variety                       | Both     | MT000407         |
| LSU0313 | Fungi    | Cucurbitariaceae sp.      | SH1244117.08FU | Florida    | Gulf variety                       | Healthy  | MT000335,500     |
| LSU0321 | Fungi    | Aspergillus clavatus      | SH1692795.08FU | Florida    | Gulf variety, Delta                | Diseased | MT000336,501     |
| LSU0361 | Fungi    | Colletotrichum sp.        | SH1543705.08FU | Florida    | Gulf variety                       | Both     | MT000409,502     |
| LSU0375 | Fungi    | Epicoccum sorghinum       | SH1547058.08FU | Florida    | australis, Gulf                    | Both     | MT000410,503     |
| LSU0376 | Bacteria | Enterobacter bugandensis  | N/A            | Florida    | Gulf variety                       | Diseased | MN992015         |
| LSU0384 | Fungi    | Nigrospora oryzae         | SH1549605.08FU | Louisiana  | americanus, Gulf, Delta            | Both     | MT000414,506     |
| LSU0393 | Fungi    | Phialemoniopsis curvata   | SH1549605.08FU | Louisiana  | Gulf variety                       | Healthy  | MT000340,415,507 |
| LSU0409 | Fungi    | Parasarocladium gamsii    | SH1291882.08FU | Louisiana  | Gulf variety                       | Diseased | MT000416,508     |
| LSU0421 | Fungi    | Dinemasporium sp.         | SH1553502.08FU | Louisiana  | Gulf variety                       | Diseased | MT000341,417,509 |
| LSU0498 | Bacteria | Pantoea ananatis          | N/A            | Louisiana  | Delta variety                      | Healthy  | MN992016         |
| LSU0528 | Fungi    | Phaeosphaeria sp.         | SH1157055.08FU | Louisiana  | Delta variety                      | Diseased | MT000342,420,512 |

|         |          |                            |                |               |                                    |          |                  |
|---------|----------|----------------------------|----------------|---------------|------------------------------------|----------|------------------|
| LSU0558 | Bacteria | Streptomycetaceae sp.      | N/A            | Louisiana     | australis, Gulf, Delta             | Diseased | N/A              |
| LSU0560 | Fungi    | Cainia sp.                 | SH1247225.08FU | Louisiana     | Gulf variety, Delta                | Diseased | MT000343,421,513 |
| LSU0565 | Fungi    | Microsphaeropsis sp.       | SH1525446.08FU | Louisiana     | Delta variety                      | Diseased | MT000422,514     |
| LSU0566 | Fungi    | Pleospora typhicola        | SH1524238.08FU | Louisiana     | Delta variety                      | Diseased | MT000423,515     |
| LSU0574 | Bacteria | Paenibacillus polymyxa     | N/A            | Louisiana     | americanus, Gulf, Delta            | Both     | MN992017         |
| LSU0620 | Fungi    | Phialemoniopsis curvata    | SH1541592.08FU | Louisiana     | Gulf variety                       | Diseased | MT000418,510     |
| LSU0629 | Fungi    | Fusarium sp.               | SH1610165.08FU | Louisiana     | Gulf variety                       | Diseased | MT000419,511     |
| LSU0648 | Fungi    | Aspergillus ustus          | SH1549902.08FU | Louisiana     | Delta variety                      | Healthy  | MT000424,516     |
| LSU0667 | Bacteria | Streptomycetaceae sp.      | N/A            | Louisiana     | Delta variety                      | Diseased | N/A              |
| LSU0677 | Fungi    | Microdochium sp.           | SH1555458.08FU | Louisiana     | Gulf variety, Delta                | Both     | MT000425,517     |
| LSU0694 | Fungi    | Phaeosphaeria sp.          | SH1151640.08FU | Connecticut   | americanus                         | Diseased | MT000244,426,518 |
| LSU0696 | Bacteria | Rhizobium radiobacter      | N/A            | Connecticut   | americanus                         | Diseased | N/A              |
| LSU0705 | Fungi    | Phaeosphaeriaceae sp.      | SH1525087.08FU | Connecticut   | americanus                         | Diseased | MT000345,427,519 |
| LSU0706 | Fungi    | Paraphaeosphaeria michotii | SH1888878.08FU | Connecticut   | americanus, australis              | Diseased | MT000428,520     |
| LSU0711 | Fungi    | Stagonospora sp.           | SH1576715.08FU | Connecticut   | americanus, australis, Gulf        | Diseased | MT000429,521     |
| LSU0719 | Fungi    | Epicoccum sorghinum        | SH1547058.08FU | Rhode Island  | australis                          | Diseased | MT000430,522     |
| LSU0722 | Fungi    | Stagonospora neglecta      | SH1525143.08FU | Rhode Island  | australis                          | Diseased | MT000431         |
| LSU0731 | Fungi    | Acrodontium crateriforme   | SH1521400.08FU | Rhode Island  | australis                          | Diseased | MT000346,432,523 |
| LSU0739 | Bacteria | Bacillus megaterium        | N/A            | Rhode Island  | australis                          | Diseased | N/A              |
| LSU0743 | Fungi    | Alternaria alternata       | SH2179670.08FU | Massachusetts | americanus                         | Healthy  | MT000433         |
| LSU0755 | Fungi    | Phaeosphaeria sp.          | SH1525091.08FU | Massachusetts | americanus                         | Diseased | MT000347,434,524 |
| LSU0760 | Fungi    | Nigrospora oryzae          | SH1549606.08FU | Massachusetts | americanus, australis, Delta       | Both     | MT000435         |
| LSU0762 | Fungi    | Phaeosphaeria sp.          | SH1156212.08FU | Massachusetts | americanus                         | Diseased | MT000348,436,525 |
| LSU0766 | Fungi    | Alternaria alternata       | SH2179670.08FU | Massachusetts | americanus, australis, Gulf, Delta | Diseased | MT000437,437,526 |
| LSU0773 | Fungi    | Biscogniauxia mediterranea | SH1554921.08FU | Massachusetts | australis                          | Healthy  | MT000438,527     |
| LSU0782 | Fungi    | Pleosporaceae sp.          | SH1157091.08FU | Massachusetts | americanus, australis, Gulf, Delta | Diseased | MT000439         |

|         |          |                                 |                             |               |                                    |          |                  |
|---------|----------|---------------------------------|-----------------------------|---------------|------------------------------------|----------|------------------|
| LSU0787 | Fungi    | <i>Irpex lacteus</i>            | SH1573566.08FU              | Massachusetts | australis                          | Diseased | MT000440         |
| LSU0795 | Fungi    | <i>Neosascochyta paspali</i>    | SH1920693.08FU              | Massachusetts | americanus, australis, Gulf, Delta | Diseased | MT000441,528     |
| LSU0801 | Fungi    | <i>Stagonospora</i> sp.         | SH1576715.08FU              | Maine         | australis                          | Diseased | MT000354,452,537 |
| LSU0807 | Fungi    | <i>Didymella glomerata</i>      | SH2232036.08FU              | Maine         | americanus, australis              | Diseased | MT000453,538     |
| LSU0829 | Fungi    | <i>Penicillium paxilli</i>      | SH1530004.08FU              | Virginia      | australis                          | Healthy  | MT000404         |
| LSU0835 | Fungi    | <i>Papiliotrema pseudoalba</i>  | SH1650804.08FU              | Maine         | americanus                         | Healthy  | MT000454         |
| LSU0848 | Fungi    | <i>Septoriella poae</i>         | SH1525210.08FU              | Maine         | americanus                         | Diseased | MT000455         |
| LSU0851 | Fungi    | <i>Phaeosphaeria</i> sp.        | SH1525087.08FU              | Maine         | americanus, australis, Gulf, Delta | Diseased | MT000355,456,539 |
| LSU0866 | Fungi    | <i>Dothioraceae</i> sp.         | Unresolved at 97% threshold | Maine         | americanus                         | Healthy  | MT000356,457,540 |
| LSU0868 | Bacteria | <i>Streptomycetaceae</i> sp.    | N/A                         | Maine         | americanus                         | Healthy  | N/A              |
| LSU0874 | Fungi    | <i>Stagonospora</i> sp.         | SH1576715.08FU              | Maine         | americanus                         | Healthy  | MT000357,458,541 |
| LSU0876 | Fungi    | <i>Stagonospora</i> sp.         | SH1525099.08FU              | Maine         | americanus                         | Both     | MT000358,459,542 |
| LSU0880 | Fungi    | <i>Phaeosphaeriaceae</i> sp.    | SH1646332.08FU              | Maine         | americanus, Gulf, Delta            | Diseased | MT000359,460,543 |
| LSU0893 | Fungi    | <i>Sarocladium strictum</i>     | SH1541921.08FU              | Maine         | americanus, australis              | Both     | MT000461,544     |
| LSU0894 | Fungi    | <i>Phaeosphaeriaceae</i> sp.    | SH1235297.08FU              | Maine         | americanus                         | Diseased | MT000360,462,545 |
| LSU0913 | Fungi    | <i>Daldinia childiae</i>        | SH1507871.08FU              | Maine         | australis                          | Diseased | MT000444,530     |
| LSU0928 | Fungi    | <i>Acrodontium crateriforme</i> | SH1521400.08FU              | Maine         | australis                          | Diseased | MT000351,445,531 |
| LSU0932 | Fungi    | <i>Paraphaeosphaeria</i> sp.    | SH1525447.08FU              | Maine         | australis, Delta                   | Diseased | MT000352,446,532 |
| LSU0936 | Fungi    | <i>Phlebia subserialis</i>      | SH1544537.08FU              | Maine         | americanus                         | Healthy  | MT000447         |
| LSU0954 | Fungi    | <i>Stagonospora</i> sp.         | SH1576715.08FU              | Maine         | americanus, australis              | Diseased | MT000533         |
| LSU0960 | Fungi    | <i>Bjerkandera adusta</i>       | SH2047468.08FU              | Maine         | americanus                         | Diseased | MT000448,534     |
| LSU0965 | Fungi    | <i>Thuemenella cubispora</i>    | SH1544084.08FU              | Maine         | australis                          | Diseased | MT000449,535     |
| LSU0976 | Fungi    | <i>Phlebiopsis flavidoalba</i>  | SH1573650.08FU              | Maine         | australis                          | Both     | MT000450         |
| LSU0994 | Fungi    | <i>Nigrospora oryzae</i>        | SH1549605.08FU              | Maryland      | australis                          | Diseased | MT000328,393,489 |
| LSU1016 | Fungi    | <i>Bjerkandera adusta</i>       | SH2047468.08FU              | Delaware      | australis                          | Healthy  | MT000393         |

|         |          |                          |                             |               |                             |          |                  |
|---------|----------|--------------------------|-----------------------------|---------------|-----------------------------|----------|------------------|
| LSU1024 | Fungi    | Sordariomycetes sp.      | SH1244533.08FU              | Louisiana     | Gulf variety                | Healthy  | N/A              |
| LSU1048 | Fungi    | Phialemoniopsis curvata  | SH1541592.08FU              | Louisiana     | Gulf variety                | Diseased | MT000361,463,546 |
| LSU1063 | Fungi    | Arthrinium sp.           | SH1540046.08FU              | Louisiana     | australis, Gulf             | Both     | MT000362,464,547 |
| LSU1108 | Fungi    | Dothideomycetes sp.      | Unresolved at 97% threshold | Louisiana     | Gulf variety                | Diseased | MT000465         |
| LSU1120 | Fungi    | Arthrinium sp.           | SH1540046.08FU              | Louisiana     | Gulf variety                | Diseased | MT000363,466,548 |
| LSU1127 | Fungi    | Paraphaeosphaeria sp.    | SH1525447.08FU              | Louisiana     | Gulf variety                | Diseased | MT000467,549     |
| LSU1134 | Bacteria | Streptomycetaceae sp.    | N/A                         | Louisiana     | Gulf variety                | Both     | N/A              |
| LSU1147 | Fungi    | Phaeosphaeriopsis musae  | SH2100711.08FU              | Louisiana     | Gulf variety                | Diseased | MT000364,468,550 |
| LSU1154 | Fungi    | Dinemasporium sp.        | SH1178094.08FU              | Louisiana     | Gulf variety                | Diseased | MT000365,469,551 |
| LSU1158 | Bacteria | Curtobacterium sp.       | N/A                         | Louisiana     | Gulf variety                | Diseased | MN992019         |
| LSU1167 | Fungi    | Colletotrichum sp.       | SH1543705.08FU              | Louisiana     | Gulf variety                | Diseased | MT000470,552     |
| LSU1175 | Fungi    | Pestalotiopsis sp.       | SH1563658.08FU              | Louisiana     | americanus, australis, Gulf | Both     | MT000366,471,553 |
| LSU1179 | Fungi    | Cladosporium sp.         | SH1572792.08FU              | Louisiana     | americanus, australis, Gulf | Both     | MT000367,472,554 |
| LSU1213 | Fungi    | Phaeosphaeriopsis musae  | SH2100711.08FU              | Louisiana     | Gulf variety                | Diseased | MT000368,473,555 |
| LSU1218 | Fungi    | Bjerkandera adusta       | SH2047468.08FU              | Louisiana     | australis, Gulf             | Diseased | MT000474,556     |
| LSU1226 | Fungi    | Penicillium sclerotiorum | SH1537124.08FU              | Louisiana     | Gulf variety                | Diseased | MT000475         |
| LSU1236 | Fungi    | Penicillium sclerotiorum | SH1537124.08FU              | Florida       | Gulf variety                | Healthy  | MT000338,411,504 |
| LSU1246 | Fungi    | Aureobasidium pullulans  | SH1674913.08FU              | Florida       | Gulf variety                | Diseased | MT000412         |
| LSU1247 |          | Unknown                  | N/A                         | Florida       | Gulf variety                | Healthy  | N/A              |
| LSU1250 | Fungi    | Paraphaeosphaeria sp.    | SH1525447.08FU              | Florida       | Gulf variety                | Diseased | MT000339         |
| LSU1284 | Bacteria | Bacillus megaterium      | N/A                         | Louisiana     | Gulf variety, Delta         | Both     | N/A              |
| LSU1322 | Fungi    | Moesziomyces bullatus    | SH1509407.08FU              | Massachusetts | americanus                  | Healthy  | MT000442         |
| LSU1329 | Fungi    | Niesslia sp.             | SH1506678.08FU              | Massachusetts | australis                   | Diseased | MT000350,443,529 |
| LSU1339 | Bacteria | Streptomycetaceae sp.    | N/A                         | Maine         | americanus                  | Both     | N/A              |
| LSU1345 | Fungi    | Xylaria sp.              | SH1704925.08FU              | Maine         | australis                   | Diseased | MT000353,451,536 |

|         |          |                               |                |           |                       |          |                  |
|---------|----------|-------------------------------|----------------|-----------|-----------------------|----------|------------------|
| LSU1351 | Fungi    | Trametes versicolor           | SH1565939.08FU | Louisiana | Gulf variety          | Healthy  | MT000476,557     |
| LSU1358 | Bacteria | Sphingomonas sp.              | N/A            | Louisiana | Gulf variety          | Diseased | MN992020         |
| LSU1369 | Fungi    | Rhinoctadiella atrovirens     | SH1970592.08FU | Louisiana | Gulf variety          | Both     | MT000477         |
| USGS01  | Bacteria | Bacillus pumilus              | N/A            | Ohio      | australis             | Diseased | N/A              |
| USGS02  | Fungi    | Stagonospora neglecta         | SH1525143.08FU | Ohio      | australis             | Diseased | MT000585,616     |
| USGS03  | Fungi    | Pleosporales sp.              | SH1920671.08FU | Michigan  | americanus            | Healthy  | MT000589,619,642 |
| USGS04  | Bacteria | Bacillus pumilus              | N/A            | Michigan  | americanus            | Healthy  | N/A              |
| USGS05  | Fungi    | Ustilaginaceae sp.            | SH1509427.08FU | Ohio      | americanus            | Diseased | MT000586,640     |
| USGS07  | Fungi    | Gibberella fujikuroi          | SH1610159.08FU | Ohio      | americanus            | Diseased | MT000587,617,641 |
| USGS08  | Fungi    | Aureobasidium pullulans       | SH1674913.08FU | Michigan  | americanus            | Healthy  | MT000590         |
| USGS09  | Fungi    | Massarinaceae sp.             | SH1576715.08FU | Ohio      | australis             | Diseased | MT000588,618     |
| USGS10  | Bacteria | Bacillus megaterium           | N/A            | Michigan  | australis             | Diseased | N/A              |
| USGS11  | Fungi    | Alternaria sp.                | SH1526398.08FU | Michigan  | australis             | Diseased | MT000591,620     |
| USGS12  | Bacteria | Curtobacterium flaccumfaciens | N/A            | Michigan  | australis             | Diseased | MT000612         |
| USGS13  | Fungi    | Phaeosphaeriaceae sp.         | SH1525087.08FU | Michigan  | australis             | Diseased | MT000592,621     |
| USGS14  | Fungi    | Achroistachys humicola        | SH2270274.08FU | Michigan  | americanus            | Diseased | MT000584,615     |
| USGS15  | Fungi    | Septoriella hubertusii        | SH2176229.08FU | Michigan  | australis             | Diseased | MT000583,614,639 |
| USGS16  | Bacteria | Bacillus pumilus              | N/A            | Michigan  | americanus            | Diseased | N/A              |
| USGS17  | Fungi    | Alternaria sp.                | SH1526398.08FU | Michigan  | americanus            | Diseased | MT000593         |
| USGS20  | Fungi    | Alternaria sp.                | SH1526398.08FU | Indiana   | americanus, australis | Diseased | MT000599,625     |
| USGS21  | Fungi    | Neovossia molinae             | SH2149896.08FU | Ohio      | americanus            | Diseased | MT000594,643     |
| USGS23  | Fungi    | Curvularia inaequalis         | SH1890305.08FU | Ohio      | americanus            | Diseased | MT000595         |
| USGS24  | Fungi    | Alternaria alternata          | SH2179670.08FU | Ohio      | americanus            | Diseased | MT000596,622     |
| USGS25  | Fungi    | Cladosporium cladosporioides  | SH1572792.08FU | Ohio      | americanus            | Diseased | MT000597,623     |
| USGS26  | Fungi    | Alternaria alternata          | SH2179670.08FU | Ohio      | americanus            | Diseased | MT000598,624     |
| USGS28  | Fungi    | Alternaria sp.                | SH1526398.08FU | Michigan  | australis             | Diseased | MT000600,626     |

|        |          |                                   |                                |          |           |          |              |
|--------|----------|-----------------------------------|--------------------------------|----------|-----------|----------|--------------|
| USGS29 | Fungi    | <i>Curvularia inaequalis</i>      | SH1890305.08FU                 | Michigan | australis | Diseased | MT000601,627 |
| USGS30 | Fungi    | <i>Pleosporaceae</i> sp.          | SH1547057.08FU                 | Michigan | australis | Diseased | MT000602,628 |
| USGS31 | Fungi    | <i>Clathrococcum neglectum</i>    | SH1547057.08FU                 | Michigan | australis | Diseased | MT000603,629 |
| USGS32 | Fungi    | <i>Bipolaris sorokiniana</i>      | SH1526399.08FU                 | Michigan | australis | Diseased | MT000604,630 |
| USGS33 | Fungi    | <i>Fusarium sporotrichioides</i>  | SH2456045.08FU                 | Michigan | australis | Diseased | MT000605,631 |
| USGS34 | Fungi    | <i>Curvularia</i> sp.             | SH1526408.08FU                 | Michigan | australis | Diseased | MT000606,632 |
| USGS35 | Fungi    | <i>Alternaria alternata</i>       | SH2179670.08FU                 | Michigan | australis | Diseased | MT000607,633 |
| USGS36 | Fungi    | <i>Deightoniella</i> sp.          | Unresolved at<br>97% threshold | Michigan | australis | Diseased | MT000608,634 |
| USGS37 | Fungi    | <i>Alternaria</i> sp.             | SH1526398.08FU                 | Michigan | australis | Diseased | MT000635     |
| USGS38 | Fungi    | <i>Alternaria</i> sp.             | SH1526398.08FU                 | Michigan | australis | Diseased | MT000609,636 |
| USGS39 | Bacteria | <i>Delftia acidovorans</i>        | N/A                            | Michigan | australis | Diseased | N/A          |
| USGS40 | Fungi    | <i>Stagonospora</i> sp.           | SH1576715.08FU                 | Michigan | australis | Diseased | MT000610,637 |
| USGS41 | Bacteria | <i>Pectobacterium carotovorum</i> | N/A                            | Michigan | australis | Diseased | MT000613     |
| USGS42 | Fungi    | <i>Fusarium sporotrichioides</i>  | SH2456045.08FU                 | Michigan | australis | Diseased | MT000638     |
